# Supplementary material for: Metformin Increases Proliferative Activity and Viability of Multipotent Stromal Stem Cells Isolated from Adipose Tissue Derived from Horses with Equine Metabolic Syndrome
Source: Cells. 2019 Jan 22;8(2):80. doi: 10.3390/cells8020080 (PMC6406832; doi:10.3390/cells8020080)
Supplement: Supplementary file 1 [file cells-08-00080-s001.xlsx]

## Sheet: Arkusz1
			miRNA	Sequence	RT primer	qPCR primer
			eca-miR-16-5p	UAGCAGCACGUAAAUAUUGGCG	TTACGTGAGAGAGAGAGAGAGCTAGAGAACCTAGCTCAATAAGAAGCGCCAA	FV	TTACGTGAGAGAGAGAGAGAG
						RV	GCTAGCAGCACGTAAATATTG
			eca-miR-21a-5p	UAGCUUAUCAGACUGAUGUUGA	ATAAGCTACAACGACCAGAGCTAGAGAACCTAGCTCACCCACTATAACAT	FV	CGCATAAGCTACAACGACCAGAG
						RV	CGGGTAGCTTATCAGACTGATGT
			eca-miR-29a-3p	UAGCACCAUCUGAAAUCGGUUA	AGATGGCAGCAGAGACGAGCTAGAGAACCTAGCTCAAGAACAATTAACCG	FV	AGATGGCAGCAGAGACGAG
						RV	CGTAGCACCATCTGAAATCGG
			eca-miR-140-3p	UACCACAGGGUAGAACCACGG	TGTGGTAAGAGAGAGAGAGAGCTAGAGAACCTAGCTCAATAAGAAGCCGTGG	FV	TGTGGTAAGAGAGAGAGAGAG
						RV	CGTACCACAGGGTAGAACCA
			eca-miR-145	GUCCAGUUUUCCCAGGAAUCCCU	AAAACTGGCGGGCACTCGTCCTAGAGTTGCTAGGACTACTCACTTAGGGAT	FV	AAAACTGGCGGGCACTC
						RV	GGTCCAGTTTTCCCAGGAATC
			eca-U6sn	CGCTTCGGCAGCACATATACTAAAATTGGAACGATACAGAGAAGATTAGCATGGCCC	GGGCCATGCTAATCTTCTCTG	FV	CGCTTCGGCAGCACAT
						RV	GGGCCATGCTAATCTTCTCTG
